# Supplementary material for: Comparison of Maternal Labor-Related Complications and Neonatal Outcomes Following Elective Induction of Labor at 39 Weeks of Gestation vs Expectant Management: A Systematic Review and Meta-analysis
Source: PubMed Central journal article supplement (PMC10182428; doi:10.1001/jamanetworkopen.2023.13162), 2023-05-12
Supplement: jamanetwopen-e2313162-s001.pdf [file jamanetwopen-e2313162-s001.pdf]

## Supplementary Online Content

Hong J, Atkinson J, Roddy Mitchell A, et al. Comparison of maternal labor-related complications and neonatal outcomes following elective induction of labor at 39 weeks of gestation vs expectant management: a systematic review and meta-analysis. *JAMA Netw Open*. 2023;6(5):e2313162.  
doi:10.1001/jamanetworkopen.2023.13162

**eTable 1.** Included Search Terms

**eTable 2.** Newcastle-Ottawa Quality Assessment Scale for Nonrandomized Studies

This supplementary material has been provided by the authors to give readers additional information about their work.

**eTable 1.** Included Search Terms

|    |                                                          |
|----|----------------------------------------------------------|
| 1  | labour.mp.                                               |
| 2  | induction.mp.                                            |
| 3  | induction of labour.mp.                                  |
| 4  | perineal injury.mp.                                      |
| 5  | Perineum {Including Related Terms}                       |
| 6  | postpartum haemorrhage.mp.                               |
| 7  | obstetric labor complications.mp.                        |
| 8  | Intensive Care Units, Neonatal {Including Related Terms} |
| 9  | anal sphincter injury {Including Related Terms}          |
| 10 | shoulder dystocia {Including Related Terms}              |
| 11 | macrosomia {Including Related Terms}                     |
| 12 | 3 <sup>rd</sup> degree tear {Including Related Terms}    |
| 13 | 4 <sup>th</sup> degree tear {Including Related Terms}    |

**eTable 2.** Newcastle-Ottawa Quality Assessment Scale for Nonrandomized Studies

<sup>a</sup> Determined based on thresholds for converting the Newcastle-Ottawa scales to Agency for Healthcare Research and Quality (AHRQ). Good quality: 3 or 4 stars in selection domain and 1 or 2 stars in comparability domain and 2 or 3 stars in outcome/exposure domain. Fair quality: 2 stars in selection domain and 1 or 2 stars in comparability domain and 2 or 3 stars in outcome/exposure domain. Poor quality: 0 or 1 star in selection domain or 0 stars in comparability domain or 0 or 1 star in outcome/exposure domain.

| Source                    | Selection (/4) | Comparability (/2) | Outcome (/3) | Overall study quality <sup>a</sup> |
|---------------------------|----------------|--------------------|--------------|------------------------------------|
| Bailit et al, 2015        | 4              | 2                  | 2            | Good                               |
| Cheng et al, 2012         | 4              | 2                  | 2            | Good                               |
| Darney et al, 2013        | 4              | 2                  | 3            | Good                               |
| Gibbs-Pickens et al, 2018 | 4              | 2                  | 3            | Good                               |
| Gibson et al, 2014        | 4              | 2                  | 2            | Good                               |
| Lappen et al, 2015        | 4              | 2                  | 2            | Good                               |
| Lee et al, 2016           | 4              | 2                  | 3            | Good                               |
| Palatnik et al, 2020      | 4              | 2                  | 2            | Good                               |
| Park et al, 2020          | 3              | 2                  | 2            | Good                               |
| Sinkey et al, 2019        | 4              | 2                  | 2            | Good                               |
| Souter et al, 2019        | 4              | 2                  | 2            | Good                               |
| Stock et al, 2012         | 4              | 2                  | 2            | Good                               |
| Zenzmaier et al, 2020     | 4              | 2                  | 3            | Good                               |
