# Supplementary material for: Comparison of Maternal Labor-Related Complications and Neonatal Outcomes Following Elective Induction of Labor at 39 Weeks of Gestation vs Expectant Management: A Systematic Review and Meta-analysis
Source: PubMed Central journal article supplement (PMC10182428; doi:10.1001/jamanetworkopen.2023.13162), 2023-05-12
Supplement: jamanetwopen-e2313162-s002.pdf [file jamanetwopen-e2313162-s002.pdf]

## Data Sharing Statement

Hong. Comparison of Maternal Labor-Related Complications and Neonatal Outcomes Following Elective Induction of Labor at 39 Weeks of Gestation vs Expectant Management. *JAMA Netw Open*. Published May 12, 2023. doi:10.1001/jamanetworkopen.2023.13162

### Data

**Data available:** No

### Additional Information

**Explanation for why data not available:** No participant data collected for this manuscript. All data will be available within manuscript and has been collected by the respective authors of papers included in the meta-analysis.
